# Supplementary material for: Targeting the Nuclear Factor-κB Rescue Pathway Has Promising Future in Human Renal Cell Carcinoma Therapy
Source: Oxford University Press journal article supplement (doi:10.1158/0008-5472.can-07-0632), 2007-12-15
Supplement: 00085472can070632-sup-tables_1-2.pdf [file 00085472can070632-sup-tables_1-2.pdf]

|                           |                                          | <b>n</b> | <b>%</b> |
|---------------------------|------------------------------------------|----------|----------|
| <b>Age (year)</b>         | Mean : 60.98 (Range : 23.44-90.07 years) |          |          |
| <b>Sexe</b>               | Men                                      | 161      | 66.8     |
|                           | Women                                    | 80       | 33.2     |
| <b>RCC Sub-type</b>       | Clear                                    | 212      | 88       |
|                           | Papillary type 1                         | 8        | 3.3      |
|                           | Papillary type 2                         | 15       | 6.2      |
|                           | Chromophobe                              | 6        | 2.5      |
| <b>pTNM stage</b>         | pT1a                                     | 60       | 24.9     |
|                           | pT1b                                     | 84       | 34.9     |
|                           | pT2                                      | 22       | 9.1      |
|                           | pT3a                                     | 26       | 10.8     |
|                           | pT3b                                     | 49       | 20.3     |
| <b>Fuhrman grade</b>      | 1                                        | 17       | 7        |
|                           | 2                                        | 92       | 38.2     |
|                           | 3                                        | 95       | 39.4     |
|                           | 4                                        | 37       | 15.4     |
| <b>Microangioinvasion</b> | Present                                  | 70       | 29       |
|                           | Absent                                   | 171      | 71       |
| <b>Tumor size (cm)</b>    | Mean : 5.8 (Range : 1-19)                |          |          |
| <b>Death</b>              | Yes                                      | 141      | 58.5     |
|                           | No                                       | 100      | 41.5     |
| <b>Death origin</b>       | Cancer-related                           | 19       | 13.5     |
|                           | Not related to cancer                    | 62       | 44       |
|                           | No information                           | 60       | 42.6     |

**Supplemental Table 1.** Clinicopathologic characteristics of the patients.

| Group         | Sodium<br>mM  | Phosphate<br>mM | Chlore<br>mM  | Creatinine<br>μM | Albumin<br>g/l | Urea<br>mM  | Weight<br>g<br>(Day 0) | Weight<br>g<br>(Day<br>35/28) |
|---------------|---------------|-----------------|---------------|------------------|----------------|-------------|------------------------|-------------------------------|
| 786-0<br>Ctl  | 141.1<br>±4.3 | 1.6<br>±0.1     | 107.9<br>±2.8 | 10.8<br>±0.4     | 24.6<br>±1.1   | 8.5<br>±0.6 | 32.8<br>±1.0           | 34.1<br>±1.3                  |
| 786-0<br>BAY  | 144.0<br>±3.7 | 2.2<br>±0.2     | 111.9<br>±2.9 | 9.5<br>±0.6      | 24.1<br>±0.8   | 8.1<br>±0.4 | 31.9<br>±0.3           | 30.9<br>±0.7                  |
| Caki-1<br>Ctl | 122.0<br>±1.9 | 1.5<br>±0.1     | 92.1<br>±1.0  | 8.1<br>±0.4      | 20.9<br>±0.3   | 6.6<br>±0.3 | 31.9<br>±0.9           | 32.7<br>±0.7                  |
| Caki-1<br>BAY | 129.2<br>±6.6 | 1.8<br>±0.3     | 98.3<br>±6.2  | 8.2<br>±0.3      | 21.7<br>±1.1   | 7.0<br>±0.8 | 31.8<br>±0.3           | 31.4<br>±0.5                  |

**Supplemental Table 2.** Treatments of nude mice with BAY 11-7085 do not affect plasma parameters and body weight. Mice treated for 35 (786-0 tumors-bearing mice) or 28 (Caki-1 tumors-bearing mice) days in control (Ctl) or with BAY 11-7085 were anesthetized and the blood was collected. Concentrations of sodium, phosphate, chlore, creatinine, albumin and urea in plasma were measured. Animal weights were measured at the beginning (Day 0) and at the end (Day 35 or Day 28 for 786-0 or Caki-1 tumors-bearing mice, respectively) of each treatment.
